## Ba<sup>2+</sup> INFLUX MEASURES THE DURATION OF MEMBRANE EXCITATION IN *PARAMECIUM*

BY KIT-YIN LING AND CHING KUNG

*Laboratory of Molecular Biology and Department of Genetics,  
University of Wisconsin, Madison, Wisconsin 53706*

(Received 27 April 1979)

### SUMMARY

We have developed an assay for the duration of membrane excitation in *Paramecium tetraurelia* by tracing the influx of <sup>133</sup>Ba<sup>2+</sup>. This assay is performed at physiological temperatures and in physiological solutions. Ba<sup>2+</sup> enters the paramecia through the Ca channels, since mutants defective in Ca channels show no significant Ba<sup>2+</sup> influx. Ba<sup>2+</sup> enters only when the Ca channels are opened during excitation which can be triggered by Na<sup>+</sup> or Ba<sup>2+</sup> itself. The ionic species and relative concentrations determine the duration of the action potentials and hence the duration of spinning or backward swimming. The longer the average period of excitation, the larger the Ba<sup>2+</sup> influx. In a Ba-Ca solution the cells spend 30% of their time in the excited state. The rate of Ba<sup>2+</sup> entry into the paramecia in that state is 1.3 mM/min. Ba<sup>2+</sup> influx occurs over a 50-fold range of Ba<sup>2+</sup> concentration. There is very little Ba<sup>2+</sup> efflux. The fate of the entered Ba<sup>2+</sup>, the consequences of the large and rapid influx, the advantages and drawbacks of the Ba<sup>2+</sup> influx assay, and the possible use of the assay for Ca channel function in cell-free preparations are discussed.

### INTRODUCTION

Jennings (1906) found that paramecia reverse the beating direction of their cilia when exposed to certain stimuli. Transient ciliary reversal causes the cell to back up for a distance. Such behaviour is called the 'avoiding reaction'. By intracellular electrical recordings, Kinoshita and co-workers (1965) showed that the paramecium membrane is excitable, i.e. it can generate action potentials. They also showed that ciliary reversal is coupled to the action potential. Further electrophysiological studies by Naitoh & Eckert showed that this membrane is permeable to Ca<sup>2+</sup> and Ba<sup>2+</sup> during excitation (Naitoh & Eckert, 1968*a, b*; Eckert, 1972). Ca<sup>2+</sup> is the natural ion that carries the action current. This transient internal accumulation of Ca<sup>2+</sup>, through an as yet unknown mechanism, leads to ciliary reversal (Naitoh & Kaneko, 1972; Naitoh & Eckert, 1974). Ba<sup>2+</sup>, as an analogue of Ca<sup>2+</sup>, presumably passes through the Ca channel and has effects similar to those of Ca<sup>2+</sup> on ciliary movement (Naitoh & Eckert, 1968*b*; Naitoh & Kaneko, 1972). Studying the influx of Ca<sup>2+</sup> or Ba<sup>2+</sup> is clearly the first step toward biochemical analyses of excitation in paramecium.

Naitoh & Yasumasu (1967) studied Ca binding components in *P. caudatum* in

solutions of millimolar  $\text{Ca}^{2+}$ . They found that other cations compete with  $\text{Ca}^{2+}$  for the binding sites and concluded that the  $\text{Ca}^{2+}$  displaced from these sites triggered ciliary reversal. Although their hypothesis remains to be tested, it is clear that the major component they measured is surface binding of  $\text{Ca}^{2+}$ . Browning & Nelson (1976) and Browning, Nelson & Hansma (1976) showed a steady accumulation of  $\text{Ca}^{2+}$  in *P. tetraurelia* incubated in solutions of 10–40  $\mu\text{M}$ - $\text{Ca}^{2+}$ . By various criteria they showed that this  $\text{Ca}^{2+}$  is internal, comes through the membrane and is related to excitation and ciliary reversal. This influx of  $\text{Ca}^{2+}$  can only be measured at 0 °C and not 24 °C presumably because of an energy- and therefore temperature-dependent Ca-extrusion mechanism. Since the volume of literature on the physiology and behaviour of paramecium deals with events at room temperature and in media of millimolar cations, it would be desirable to have a biochemical assay of excitation under these physiological conditions.

The amplitude of the action potential of paramecium is usually graded with the stimulus. In Ba-Ca solutions, however, all-or-none action potentials are generated even without other stimuli (Kinosita, Murakami & Yasuda, 1965; Naitoh & Eckert, 1968*b*). The duration of the action potential is proportional to the ratio of the concentration of the two divalent cations,  $[\text{Ba}^{2+}]/[\text{Ca}^{2+}]$ , in the bath (Naitoh & Eckert, 1968*b*). Resistance measurements show that the membrane is highly permeable during the prolonged action potential (Satow, Hansma & Kung, 1976). Naitoh & Eckert (1968*b*) proposed that barium had its effect by entering through the Ca channel, and then blocking the short-circuiting  $\text{K}^+$  efflux. Browning & Nelson (1976) showed that  $\text{Ba}^{2+}$  is a competitive inhibitor of  $\text{Ca}^{2+}$  influx. In this paper, we report the  $\text{Ba}^{2+}$  influx in *P. tetraurelia* at room temperature, and compare the rate of influx with the duration of backward swimming.

#### MATERIALS AND METHODS

##### *Stocks*

Four strains of *Paramecium tetraurelia* (formerly *P. aurelia*, species 4) were used. They were the wild-type strain, stock 518 (non-kappa-bearing); a pawn mutant, stock d4-95 (genotype *pwB/pwB*); a temperature-sensitive pawn, d4-132 (*pwA/pwA*); and a paranoiac mutant, d4-90 (*PaA/PaA*). The mutants were all derived from stock 518. The behavioural and electrophysiological phenotypes and the genetics of these strains have been described (Kung, 1971; Kung & Eckert, 1972; Chang & Kung, 1973; Satow, Chang & Kung, 1974; Satow *et al.* 1976).

##### *Culture methods*

Cells were cultured in cerophyl medium inoculated with *Enterobacter aerogenes* (Sonneborn, 1970) at either room temperature ( $23 \pm 1$  °C) or  $35 \pm 1$  °C.

##### *Chemicals*

$^{133}\text{BaCl}_2$  in 0.5 M-HCl (0.4–1.0 mCi/m-mole) was from New England Nuclear Corp. All other chemicals were analytical reagent grade.

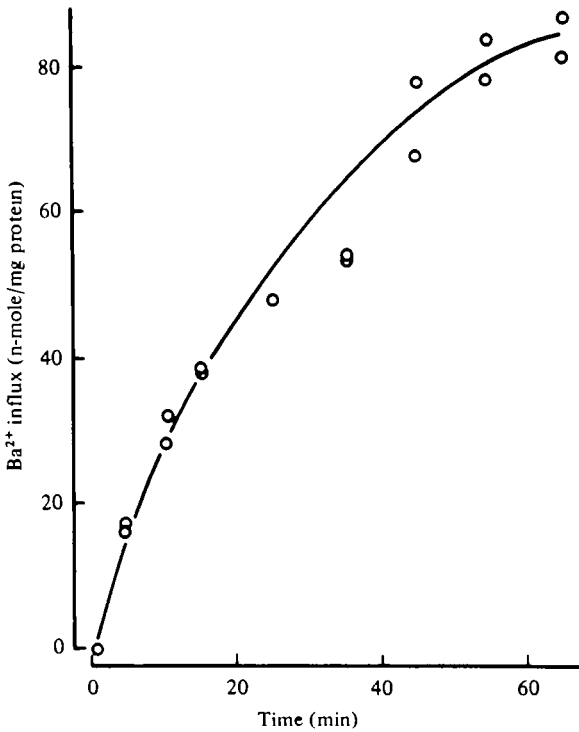

Fig. 1. Time course of barium accumulation in wild-type *Paramecium* (518) in influx medium containing 7.3 mM [Ba<sup>2+</sup>] and 0.85 mM [Ca<sup>2+</sup>]. Each point is the average of duplicate samples from the same experiment. The results of two experiments are presented.

Ba<sup>2+</sup> in the medium, by sampling at various times using the above centrifugation technique.

### Behavioural observations

Swimming behaviour of paramecia was monitored under a stereomicroscope as the ion flux experiments were carried out. In separate experiments, the duration and frequency of avoiding reactions in forms of jerks, spins or backward swimming in various influx media were monitored and registered with an event recorder equipped with hand-press switches. We estimate that there was a fairly uniform lag of  $\sim 0.3$  s between the occurrence and the registration of an event. Durations of backward swimming over 1 s in each influx medium were measured from the records, tabulated, and compared.

## RESULTS

### Time course of Ba<sup>2+</sup> influx

Fig. 1 shows the accumulation of Ba<sup>2+</sup> in wild-type *P. tetraurelia* bathed in Ba-Ca solution. This solution contains 0.85 mM free Ca<sup>2+</sup> and 7.3 mM free Ba<sup>2+</sup>. It is known to trigger prolonged action potentials (Naitoh & Eckert, 1968*b*) and sustained backward swimming or spinning (see below). The Ba<sup>2+</sup> accumulation is rapid. 42 n-mole/mg protein (s.d. 9,  $n = 12$ ) are accumulated in the first 15 min. Within this 15 min,

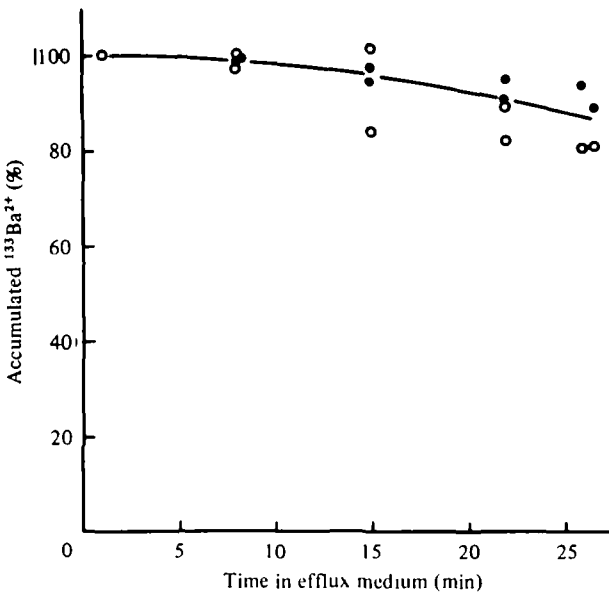

Fig. 2. Time course of barium efflux in wild-type *Paramecium* (519). Cells were prepared and preloaded with <sup>133</sup>Ba<sup>2+</sup> in 7.3 mM [Ba<sup>2+</sup>]-0.85 mM [Ca<sup>2+</sup>] influx medium for 15 min as described in Materials and Methods. Cells were resuspended in efflux medium with (○) and without (●) unlabelled 7.3 mM [Ba<sup>2+</sup>]. Amount of radioactivity remaining in samples is represented as percentage of barium accumulation measured at time zero. Each point is the average of duplicate samples from the same experiment. The results of two experiments are presented.

the rate of accumulation does not change (Figs. 3a and 7a). The rate decreases gradually after 15 min.

The morphology and behaviour of the paramecia were closely monitored during the influx experiments. The paramecia swell slightly when first transferred into the Ba-Ca solution. Within 10–15 min, their contractile vacuoles slow down. By 30 min, blisters begin to form on the surface of some cells. The proportion of damaged cells increases with time. By 45 min, some cells begin to lyse. In this Ba-Ca solution, paramecia swim backward or spin tens of seconds at a time. Between bouts of backing or spinning, they swim forward. The degree of deterioration corresponds to the amount of backing or spinning in these and the following experiments. It appears that some correlates of prolonged membrane excitation, most likely the accumulation of Ba<sup>2+</sup> and/or Ca<sup>2+</sup>, poison the paramecia. The decline in the accumulation rate after 15 min may be a secondary effect of this Ba- (or Ca-) poisoning. Thus, all 'influx rates' described below refer to the rate of Ba<sup>2+</sup> accumulation during the first 15 min.

#### *Ba*<sup>2+</sup> efflux

Paramecia were preloaded with <sup>133</sup>Ba<sup>2+</sup> in the above Ba-Ca solution for 15 min and then washed and resuspended in media with or without the added Ba<sup>2+</sup>. Cells were sampled at different times for their radioactivity. As shown in Fig. 2, the cells release little of the preloaded Ba<sup>2+</sup> whether or not there is Ba<sup>2+</sup> in the medium. In either case, less than one-tenth of the accumulated Ba<sup>2+</sup> has left the cells in 15 min. Since little

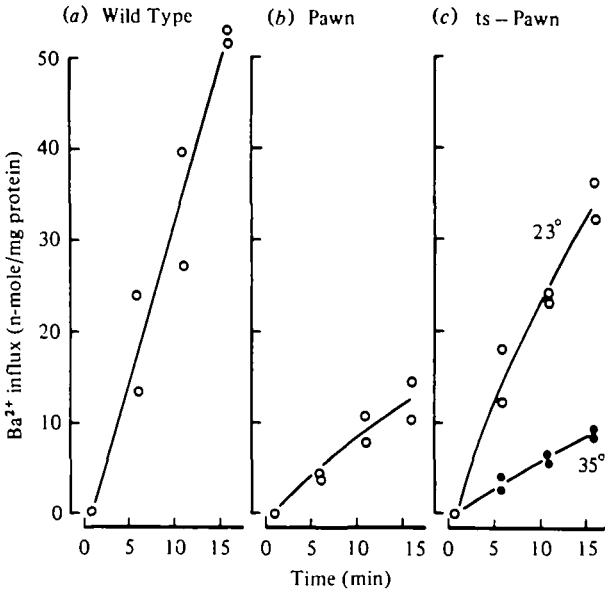

Fig. 3. Barium influx assays of (a) wild type, 518 at 23 °C; (b) pawn, d4-95 at 23 °C; and (c) temperature-sensitive pawn, d4-132 grown at 23 °C (○) and at 35 °C (●) in influx medium containing 7.3 mM [Ba<sup>2+</sup>] and 0.85 mM [Ca<sup>2+</sup>]. Each point is the average of duplicate samples from the same experiment. The results of two experiments are presented.

efflux occurs, the net Ba<sup>2+</sup> accumulation rate measured in the influx experiments is a close estimate of the true influx rate.

#### *Pawn mutants*

Pawns are mutants that have lost the function of their voltage-sensitive Ca channels (Kung & Eckert, 1972; Schein, Bennett & Katz, 1976; Oertel, Schein & Kung, 1977). Consequently, they do not generate action potentials and do not jerk or back up. Fig. 3*b* shows that they also do not show significant Ba<sup>2+</sup> influx as compared to the wild-type cells in Fig. 3*a*. The temperature-sensitive pawn mutant shows Ba<sup>2+</sup> influx when grown at 23 °C, but fails to accumulate Ba<sup>2+</sup> when grown at 35 °C (Fig. 3*c*). The temperature-sensitive pawns show subnormal membrane excitability when grown at 23 °C (Satow & Kung, 1976), but lose their excitability completely when grown at 35 °C (Satow *et al.* 1974; Satow & Kung, 1974). These experiments show that significant Ba<sup>2+</sup> influx can occur only when there are functional Ca channels.

#### *Effects of [Ba<sup>2+</sup>] and [Ca<sup>2+</sup>] on the Ba<sup>2+</sup> influx rate*

The kinetics of Ba<sup>2+</sup> influx were examined by studying the influx rate in both wild-type and pawn mutant (d4-95) as a function of Ba<sup>2+</sup> concentration in the medium. Fig. 4 shows that Ba<sup>2+</sup> influx is concentration dependent, but is clearly not a first-order, saturable process. Little Ba<sup>2+</sup> is accumulated in the pawn over the range of Ba<sup>2+</sup> concentration studied. Ba<sup>2+</sup> is accumulated very slowly when wild-type paramecia are bathed in media of 1.7 or 3.4 mM [Ba<sup>2+</sup>]. Above 4 mM, the influx rate increases abruptly. Beyond 12 mM, the paramecia are damaged, as judged by morphological criteria, within the first 15 min in which the rate is measured.

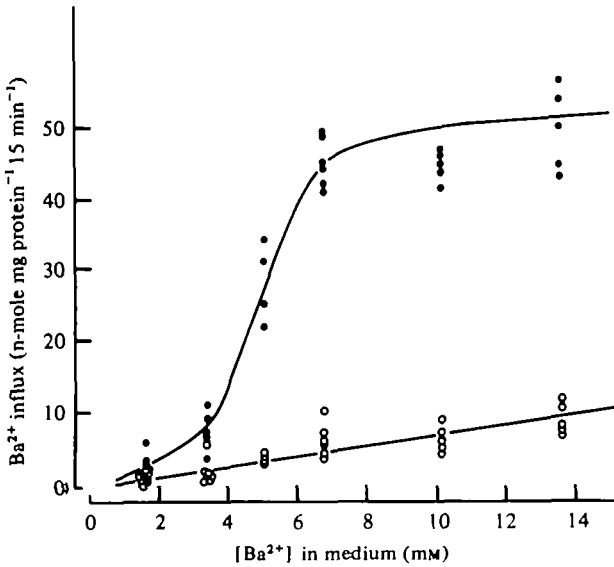

Fig. 4. Rate of barium influx in wild type 518 (●) and pawn mutant d4-95 (○) *Paramecium* in influx media containing 0.85 mM free calcium and various free barium concentrations. The results of four to six experiments are shown. Each point represents the average of duplicate samples in each experiment.

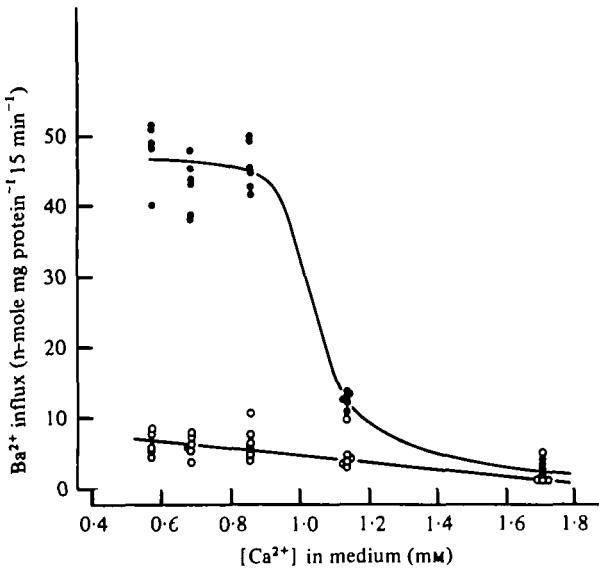

Fig. 5. Rate of barium influx in wild type 518 (●) and pawn mutant d4-95 (○) in influx medium containing 6.8 mM free barium and various free calcium concentrations. The results of four to six experiments are shown. Each point represents the average of duplicate samples in each experiment.

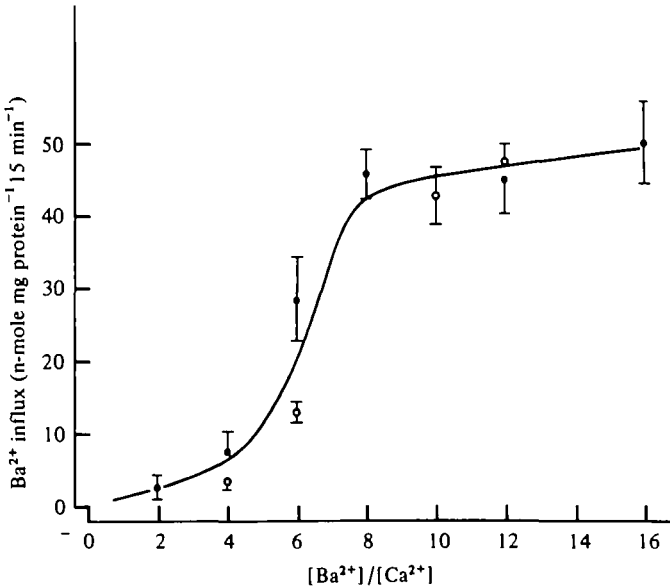

Fig. 6. Effect of the Donnan ratio,  $[Ba^{2+}]/[Ca^{2+}]$ , on the rate of  $Ba^{2+}$  influx in wild type (518). Open symbols and bars are means  $\pm$  S.D. ( $n = 4-6$ ) from experiments with influx media containing 0.85 mM  $[Ca^{2+}]$  and various  $[Ba^{2+}]$ ; closed symbols represents experiments with media containing 6.8 mM  $[Ba^{2+}]$  and various  $[Ca^{2+}]$ . Note that the rate of  $Ba^{2+}$  influx is largely a function of the ratio and not the absolute concentration of ions.

When  $[Ba^{2+}]$  is kept at 6.8 mM and  $[Ca^{2+}]$  varied, it is clear that the  $Ba^{2+}$  influx rate is also dependent upon  $[Ca^{2+}]$ . While the influx rate of the pawn does not change significantly, that of wild-type cells drops precipitously as the  $[Ca^{2+}]$  increases from 0.85 to 1.13 mM (Fig. 5). Toxic effects of media with less than 0.5 mM  $[Ca^{2+}]$  preclude meaningful measurements in them.

Figs. 4 and 5 show that increasing  $[Ca^{2+}]$  has opposite effects to those obtained by increasing  $[Ba^{2+}]$ . However, the opposite effects cannot be explained by a simple substrate competition for common carriers alone. Behavioural experiments in this paper and physiological studies in the literature (see Discussion) show that the ratio  $[Ba^{2+}]/[Ca^{2+}]$  determines the duration of excitation during which the Ca channels presumably open. The curve obtained by replotting the data in Figs. 4 and 5 in terms of the ratio of  $[Ba^{2+}]/[Ca^{2+}]$  in the medium is consistent with this view (Fig. 6). To test this view directly, influx rates were measured in media with a tenfold concentration change of  $[Ba^{2+}]$  and  $[Ca^{2+}]$ . Fig. 7 shows the rate of  $Ba^{2+}$  influx in two sets of solutions, one being one-tenth the concentration of the other. The two solutions have a  $[Ba^{2+}]/[Ca^{2+}]$  ratio of approximately 8/1 in Fig. 7a, 6/1 in Fig. 7b, and 4/1 in Fig. 7c. (The actual  $[Ba^{2+}]/[Ca^{2+}]$  ratios for full-strength media are 8.5, 6.2, and 4.0; those for the one-tenth strength media are 8.4, 6.3 and 4.2). Nevertheless, the tenfold dilution has no effect on the rate of  $Ba^{2+}$  influx, and the rate of  $Ba^{2+}$  influx is determined mainly by the  $[Ba^{2+}]/[Ca^{2+}]$  ratio.

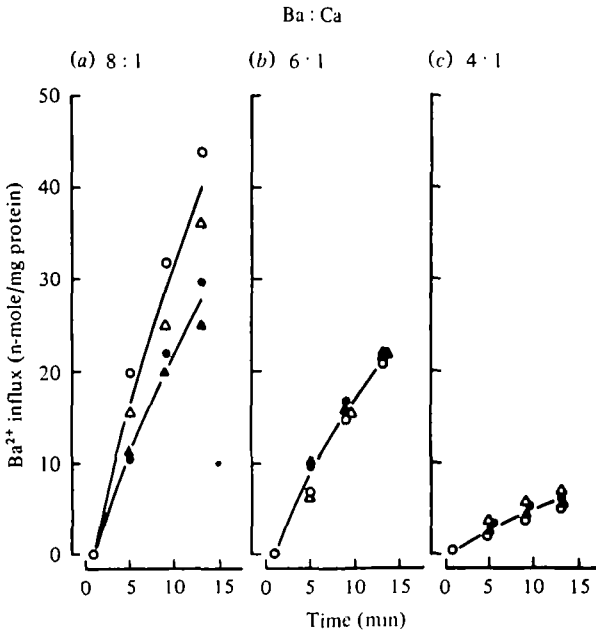

Fig. 7. Effects of the  $[Ba^{2+}]/[Ca^{2+}]$  ratio on the  $Ba^{2+}$  influx. The ratio is approximately 8 in (a), 6 in (b), and 4 in (c). Note that the rate of  $Ba^{2+}$  influx decreases as the ratio decreases. Open symbols ( $\circ$  and  $\triangle$ ) are from experiments with full-strength media; closed symbols ( $\bullet$  and  $\blacktriangle$ ) are from media of  $1/10$  the ionic strength. Note that the influx rate is independent of the absolute concentrations of ions. (The actual  $[Ca^{2+}]$  is  $0.85$  mM in the full-strength and approximately  $0.09$  mM in the diluted media. The actual  $[Ba^{2+}]$  is  $7.3$  mM and  $0.76$  mM in (a),  $5.3$  mM and  $0.57$  mM in (b), and  $3.4$  mM and  $0.38$  mM in (c).) The results of two sets of experiments are shown. Each point is the average of duplicate samples from the same experiment.

#### *Behaviour and membrane excitation of paramecia in the Ba-Ca solutions*

We monitored the duration and frequency of forward and backward locomotion of paramecia with an event recorder for 20 min after the cells were transferred into various Ba-Ca solutions. Samples of the record are shown in Fig. 8. When the  $[Ca^{2+}]$  is kept at  $0.85$  mM (Fig. 8a) the cells respond with increasing vigour as  $[Ba^{2+}]$  increases. At  $1.7$  mM  $[Ba^{2+}]$ , paramecia perform quick, almost rhythmic jerks of high frequency ( $\sim 1$  Hz; data not shown). This type of behaviour corresponds to action potentials lasting only a few tens of milliseconds and is often dubbed the 'barium dance'. At  $3.4$  mM  $[Ba^{2+}]$ , the jerks are less frequent and the backing step of the dance is slightly longer but still too short to be measured by eye. At  $5.1$  mM, backing or spinning up to 60 s is occasionally seen besides short jerks. At  $6.8$  mM and  $10.2$  mM  $[Ba^{2+}]$ , 20–50% of the cells are in backing or spinning bouts at any time. These results are summarized in Table 1. Note that below  $5$  mM  $[Ba^{2+}]$ , paramecia do not swim backward for longer than 1 s. This correlates with the lack of significant  $Ba^{2+}$  influx at similar concentrations (Fig. 4).

When  $[Ba^{2+}]$  is held at  $6.8$  mM and  $[Ca^{2+}]$  varied (Fig. 8b), behavioural response weakens as the  $[Ca^{2+}]$  increases. At  $1.7$  or  $3.4$  mM  $[Ca^{2+}]$ , there are barium dances but no backing or spinning. This lack of backing or spinning corresponds to the lack



Table 1. Percentage time that wild-type *P. tetraurelia* spent on backing or spinning bouts of various lengths\* for the first 20 min in different Ba-Ca solutions

| Bout length † (s) | [Ba <sup>2+</sup> ] in Ba-Ca solutions † |        |        |        |
|-------------------|------------------------------------------|--------|--------|--------|
|                   | 1.7 mM                                   | 3.4 mM | 5.1 mM | 6.8 mM |
| 1-20              | 0                                        | 0      | 6.2    | 8.6    |
| 20-40             | 0                                        | 0      | 4.0    | 11.5   |
| 40-60             | 0                                        | 0      | 2.2    | 5.2    |
| 60-80             | 0                                        | 0      | 3.8    | 3.2    |
| >80               | 0                                        | 0      | 0      | 0      |

\* The behaviour of paramecia after the transfer from the preinflux solution to the Ba-Ca solution was monitored for 20 min. Each entry in this table is derived from the results from at least 19 paramecia. Forward swimming between bouts accounts for the major portion of the time.

† See Materials and Methods for complete compositions.

‡ Jerks lasting less than a second cannot be measured accurately.

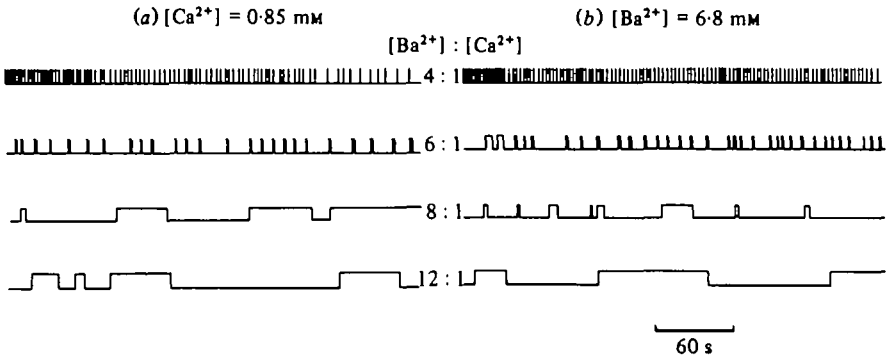

Fig. 8. Frequency and duration of forward and backward swimming of wild-type paramecia in various Ba-Ca media. The behaviour of paramecia were monitored with a microscope and their directions of movement were registered with a manually operated event recorder. The lower level of the traces indicates the paramecium is swimming forward; the upper level backward. Short spikes are jerks and long plateaus are sustained backward swimming. Note that when the [Ba<sup>2+</sup>]/[Ca<sup>2+</sup>] ratio is above 5, long bouts of backward swimming are observed.

of significant Ba<sup>2+</sup> influx at these [Ca<sup>2+</sup>] (Fig. 5). At 8 mM-Ca<sup>2+</sup> even the dance is eliminated (data not shown).

#### Na<sup>+</sup>-stimulated Ba<sup>2+</sup> influx

In the previous experiments of Ba<sup>2+</sup> influx, the excited state of the membrane is induced and maintained by Ba<sup>2+</sup> itself. Paramecia can also be excited by high [Na<sup>+</sup>] relative to [Ca<sup>2+</sup>] (Naitoh, 1968; Naitoh & Eckert, 1968a; Satow & Kung, 1974; Satow *et al.* 1976) especially in solutions having a small amount of Ba<sup>2+</sup>. Mutants (the 'paranoiacs') exist which have prolonged excitation in Na<sup>+</sup> solution (Kung, 1971; Satow & Kung, 1974; Hansma & Kung, 1976; Satow *et al.* 1976). Fig. 9a shows the background Ba<sup>2+</sup> influx of the wild type and a paranoiac mutant in a medium containing 1.6 mM [Ba<sup>2+</sup>] and 0.7 mM [Ca<sup>2+</sup>]. Paramecia of both strains swim forward with occasional avoiding reactions with no sustained backward swimming in this medium. When 16 mM-Na<sup>+</sup> is added to the Ba-Ca medium, there is an increase in

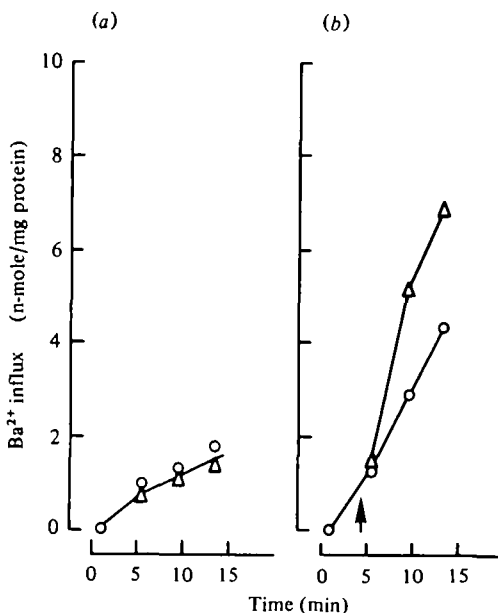

Fig. 9. Na-stimulated Ba<sup>2+</sup> influx in wild-type and paranoiac mutant of *Paramecium*. Barium influx was assayed in medium containing 1.6 mM [Ba<sup>2+</sup>] and 0.7 mM [Ca<sup>2+</sup>]: (a) No Na<sup>+</sup> was added, and (b) final concentration of 16 mM-NaCl was added to the influx assay mixture at minute 4 as denoted by the arrow. Circles are the wild-type (518) cells and triangles are the paranoiac mutant (d4-90). One representative experiment is presented here with each point being the average of duplicate samples. Four independent experiments gave similar results.

Ba<sup>2+</sup> influx (Fig. 9b). Furthermore, the increase is significantly larger in the paranoiac mutant than in wild type. This observation is consistent with the finding of Browning *et al.* (1976) where paranoiac mutants accumulate more Ca<sup>2+</sup> than wild type when excited with Na<sup>+</sup>. Wild-type paramecia show rapid jerks as well as repeated backward swimming for tens of seconds in this Na-Ba medium. The paranoiac mutants swim backward for even longer periods in tighter helices than wild type. This is similar to the previously observed 'paranoiac' behaviour in a Na-containing solution (Kung, 1971; Browning *et al.* 1976; Satow *et al.* 1976).

These results again show that significant Ba<sup>2+</sup> influx only occurs when there is prolonged excitation. With Ba<sup>2+</sup> behaving as a Ca<sup>2+</sup> analogue, the Ba<sup>2+</sup> influx assay measures the duration of the excited state, in which the Ca channels open, regardless of how the excited state is triggered and sustained.

#### DISCUSSION

##### *Surface binding or influx?*

We believe that the Ba<sup>2+</sup> influx reported in this paper represents internal accumulation and not Ba<sup>2+</sup> binding on the cell surface. The reasons are the following: (1) The Ba<sup>2+</sup> accumulation continues after 30 min (Fig. 1), whereas most surface binding, including the cation binding in *Paramecium* studied by Naitoh & Yasumasu (1967), is saturated within 1 min. (2) Once accumulated, most of the Ba<sup>2+</sup> cannot be

released even after prolonged incubation in Ba-free medium (Fig. 2). It is not likely that  $Ba^{2+}$  becomes adsorbed on the surface since the physiological and behavioural effects of  $Ba^{2+}$  are reversible and can be counteracted by  $Ca^{2+}$ . (3) If  $Ba^{2+}$  accumulates on the cell surface, one would expect a  $^{133}Ba^{2+}$ - $^{137}Ba^{2+}$  exchange when  $^{133}Ba^{2+}$ -loaded cells are transferred into the efflux medium with unlabelled  $Ba^{2+}$ . This expected exchange is not observed (Fig. 2). (4) The amount of  $Ba^{2+}$  accumulated is large (below). It is difficult to imagine that the paramecium surface has such a large capacity for  $Ba^{2+}$  binding.

#### *The amount of $Ba^{2+}$ accumulated*

In the influx experiments with 7.3 mM [ $Ba^{2+}$ ] and 0.85 mM [ $Ca^{2+}$ ] (Fig. 1), the influx of  $Ba^{2+}$  causes an increase in internal  $Ba^{2+}$  by 0.4 mM/min, considering a cell volume of  $10^{-7}$  ml. If the accumulation is within the lumen of the cilia, the concentration will rise 100 times as fast. This rapid and large influx of  $Ba^{2+}$  has three implications. (1) The membrane is highly permeable to  $Ba^{2+}$  during excitation. (2) Much of the  $Ba^{2+}$  accumulated is not free  $Ba^{2+}$ , otherwise the internal concentration of  $Ba^{2+}$  will exceed the external concentration in 20 min and influx will cease. The  $Ba^{2+}$  is most likely precipitated since most Ba salts dissociate poorly. (3) There must be fluxes of at least one other ion to balance the influx of  $Ba^{2+}$ . Taking the membrane capacitance of  $1 \mu F/cm$  and a total surface of  $4 \times 10^{-4} cm^2$  (Eckert & Naitoh, 1980; Eckert, 1972), the paramecium membrane will be depolarized by 20 volts per minute. In reality, the membrane depolarizes and repolarizes by 10–20 millivolts at the up- and down-strokes of the action potentials. A counterion flux, such as a  $K^+$  efflux, must occur. In the cases of the 'paranoiac' mutants which show prolonged excitation, loss of cellular  $K^+$  has been shown (Naitoh & Eckert, 1968*b*; Hansma & Kung, 1976).

#### *When does the $Ba^{2+}$ enter?*

When we increase the [ $Ba^{2+}$ ]/[ $Ca^{2+}$ ] ratio by increasing the [ $Ba^{2+}$ ] or decreasing the [ $Ca^{2+}$ ], prolonged backing or spinning occurs only in solutions of ratios bigger than 4:1 (Fig. 8*a, b* and Table 1). Only in these solutions do we observe significant  $Ba^{2+}$  influx (Figs. 4, 5 and 7). Prolonged backing or spinning corresponds to prolonged action potentials. At the plateaus of these action potentials the membrane is highly permeable as shown by the very low electrical resistance (Naitoh & Eckert, 1968*b*; Satow *et al.* 1976). Therefore, we conclude that the  $Ba^{2+}$  enters the cells when the membrane is excited, i.e. during the action potentials. The membrane excitation can be stimulated by ions other than  $Ba^{2+}$ . Fig. 9 shows that as long as the membrane is excited, in this case due to the presence of  $Na^+$ ,  $Ba^{2+}$  will enter the cell regardless of how the excitation is triggered.

#### *The path of $Ba^{2+}$ influx*

Ions cross the cell membrane through specific channels. The literature on crustacean muscle (Hagiwara, Fukuda & Eaton, 1974) and *Paramecium* (Naitoh & Eckert, 1968*b*) indicates that there are Ca channels on the membranes of these cells through which  $Ca^{2+}$  and its analogues, including  $Ba^{2+}$ , enter. This view is supported by the experiments in Figs. 3, 4 and 5 which show that paramecium mutants with membranes defective in their Ca channels have no significant  $Ba^{2+}$  influx. The Ca channels

are voltage sensitive. When the membrane is depolarized, the Ca channels open, through which Ca (or Ba) ions are driven by the electrochemical gradient into the cell (Browning & Nelson, 1976; Kung & Eckert, 1972; Naitoh, Eckert, & Friedman 1972; Eckert, Naitoh & Machemer, 1976; Oertel *et al.* 1976; Satow & Kung, 1979). The experiments shown in Figs. 3–5, taken together, indicate that unless the wild-type membrane is excited (depolarized) and the Ca channels are open, there is no significant Ba<sup>2+</sup> influx. Therefore, we conclude that Ba<sup>2+</sup> enters the paramecium through its Ca channels when they are open during excitation.

Comparison of the electrophysiology of ciliated, deciliated and reciliated paramecia show that the Ca channels are largely, if not exclusively, located on the ciliary membrane and not the plasma membrane (Ogura & Takahashi, 1976; Dunlap, 1977). The exact location of these channels, the ports of the Ca<sup>2+</sup> or Ba<sup>2+</sup> entry, on the cilia has not been determined. Whether the Ba<sup>2+</sup> entered precipitates in the ciliary lumen or diffuses into the cell body before it is precipitated or sequestered is not known. Finally, we also do not know if the small Ba<sup>2+</sup> efflux (Fig. 2) is due to the energy-consuming Ca pump (Browning & Nelson, 1976).

#### *Donnan ratio and the duration of excitation*

The duration of backward swimming has long been used as a simple measure of the duration of excitation, and the relation between this duration of excitation and the ionic species and strength in the media has been sought. This duration is independent of the absolute concentration of K<sup>+</sup>, but is dependent on the ratio of [K<sup>+</sup>] to [Ca<sup>2+</sup>] (Kamada & Kinoshita, 1940), more precisely the Donnan ratio [K<sup>+</sup>]/[Ca<sup>2+</sup>]<sup>½</sup> (Naitoh & Yasumasu, 1967; Jahn, 1962; Naitoh, 1968). In Ba<sup>2+</sup>-containing solutions, the Donnan ratio [Ba<sup>2+</sup>]<sup>½</sup>/[Ca<sup>2+</sup>]<sup>½</sup> also determines the duration of excitation (Naitoh & Eckert, 1968*b*). A competition between Ca<sup>2+</sup> and other cations is implicated (Naitoh & Yasumasu, 1967), although the mechanism by which this competition leads to the control of ion channels is not clear (Eckert, 1972). In a voltage clamp study, Oertel *et al.* (1977) concluded that the Ca<sup>2+</sup> inward current subsides in time when the cell is bathed in a physiological K-Ca solution. This is known as inactivation of the Ca channel and may mean that the Ca channel closes with time (5 ms in this case) even when the membrane remains depolarized by the clamp. However, there are clearly more extreme conditions under which the excited states last for tens of seconds (Naitoh & Eckert, 1968*b*; Satow *et al.* 1976; Satow, 1978; Eckert & Brehm, 1979). Brehm & Eckert (1978) showed that Ba<sup>2+</sup> interferes with the inactivation and prolongs the inward current. Here, we changed the ion ratio to generate longer or shorter excited states so as to afford a comparison between the rate of Ba<sup>2+</sup> influx and the duration of excitation.

#### *Evaluation of the Ba<sup>2+</sup> influx assay*

Physiological measurements of the membrane voltage and currents in various conditions allow us to deduce the species of ions which permeate through the membrane. In some instances, the quantity of the ion fluxes can also be calculated. However, tracing the fluxes of the ions with radioisotope yields the most direct measurement of the ion movements and the conclusions from such measurements depend on few assumptions. An assay of the movement of the ions which carry the action current

during excitation makes it possible to study the voltage-sensitive gating mechanism without employing electrophysiological procedures. In the *Paramecium* field, Browning & Nelson (1976) first developed an assay tracing the action current with  $^{45}\text{Ca}$ . The  $\text{Ba}^{2+}$  influx assay described in this paper is inspired by their work and has two added advantages. (1) This assay is performed at room temperature, at which most of the previous behavioural and physiological experiments have been performed. (2) The assay is performed in solutions in the physiological range of ions, millimolar in concentration. Thus, this assay can measure the duration of membrane excitation previously measured only by behavioural or electrophysiological means.

The  $\text{Ba}^{2+}$  influx assay has two drawbacks. (1) Like most biochemical assays, it cannot be used to study rapid events in millisecond scale. (2) It cannot resolve the small  $\text{Ba}^{2+}$  influx during short action potentials, even when they are induced in frequency of around 1 Hz as during the barium dance. The poor resolution is due to the background  $\text{Ba}^{2+}$  accumulation, as seen in the pawn experiment (Fig. 3*b, c*).  $\text{Ba}^{2+}$  uptake unrelated to excitation may be due to surface binding or entry through food vacuole formation.

Cell-free preparations such as isolated cilia or membrane vesicles are used in cell biological and biochemical investigations. We would like to know if such preparations retain functional Ca channels of proper orientation after various fractionation procedures. Conventional physiological tests for excitability cannot be performed upon cilia or vesicles since they are smaller than the tip of a micro-electrode. With the  $\text{Ba}^{2+}$  influx assay described here, we can now test these cell-free preparations for their competence in membrane excitation under physiological conditions.

We are grateful to Y. Satow and D. L. Nelson for valuable discussions and C. K. Omoto, C. S. Schobert, C. L. Shusterman, A. Adoutte, M. A. Forte, T. G. Linn and Y. Saimi for their critical review of the manuscript. This work was supported by grant GM22714 from the National Institutes of Health.

#### REFERENCES

- BREHM, P. & ECKERT, R. (1978). Calcium entry leads to inactivation of calcium channel in *Paramecium*. *Science, N.Y.* **202**, 1203-1206.
- BROWNING, J. L. & NELSON, D. L. (1976). Biochemical studies of the excitable membrane of *Paramecium aurelia*. I.  $^{45}\text{Ca}^{++}$  fluxes across resting and excited membrane. *Biochim. Biophys. Acta* **448**, 338-351.
- BROWNING, J. L., NELSON, D. L. & HANSMA, H. G. (1976).  $\text{Ca}^{++}$  influx across the excitable membrane of behavioural mutants of *Paramecium*. *Nature, Lond.* **259**, 491-494.
- CHANG, S. Y. & KUNG, C. (1973). Temperature-sensitive pawns: conditional behavioral mutants of *Paramecium aurelia*. *Science, N.Y.* **180**, 1197-1199.
- DRYL, S. (1959). Effects of adaptation to environment on chemotaxis of *Paramecium caudatum*. *Acta Biol. exp.* **19**, 83-93.
- DUNLAP, K. (1977). Localization of calcium channels in *Paramecium caudatum*. *J. Physiol., Lond.* **271**, 119-133.
- ECKERT, R. (1972). Bioelectric control of cilia. *Science, N.Y.* **176**, 473-481.
- ECKERT, R. & BREHM, P. (1979). Ionic mechanisms of excitation in *Paramecium*. *Ann. Rev. Biophys. & Bioeng.* **8**, 353-383.
- ECKERT, R. & NAITOH, Y. (1970). Passive electrical properties of *Paramecium* and problems of ciliary coordination. *J. gen. Physiol.* **55**, 467-483.
- ECKERT, R., NAITOH, Y. & MACHEMER, H. (1976). Calcium in the bioelectric and motor functions of *Paramecium*. In *Calcium in Biological Systems* (ed. C. J. Duncan), pp. 233-255. London, New York and Melbourne: Cambridge University Press.

- HAGIWARA, S., FUKUDA, J. & EATON, D. C. (1974). Membrane currents carried by Ca, Sr and Ba in barnacle muscle fiber during voltage clamp. *J. gen. Physiol.* **63**, 564-578.
- HANSMA, H. G. & KUNG, C. (1976). Defective ion regulation in a class of membrane-excitation mutants in *Paramecium*. *Biochim. Biophys. Acta* **436**, 128-139.
- JAHN, T. L. (1962). The mechanism of ciliary movement. II. In antagonism and ciliary reversal. *J. cell comp. Physiol.* **60**, 217-228.
- JENNINGS, H. S. (1906). *Behavior of the Lower Organisms*. New York; Columbia University Press.
- KAMADA, T. & KINOSITA, H. (1940). Calcium-potassium factor in ciliary reversal of *Paramecium*. *Proc. Imp. Acad., Tokyo* **16**, 125-130.
- KINOSITA, H., MURAKAMI, A. & YASUDA, M. (1965). Interval between membrane potential change and ciliary reversal in *Paramecium* immersed in Ba-Ca mixture. *J. Fac. Sci., Univ. Tokyo*, IV-10, 421-425.
- KUNG, C. (1971). Genic mutants with altered system of excitation in *Paramecium aurelia*. I. Phenotypes of the behavioral mutants. *Z. vergl. Physiol.* **71**, 142-164.
- KUNG, C. & ECKERT, R. (1972). Genetic modification of electric properties in an excitable membrane. *Proc. Natn. Acad. Sci., Wash.* **69**, 93-97.
- LOWRY, O. H., ROSEBROUGH, N. J., FARR, A. L. & RANDALL, R. J. (1951). Protein measurement with the folin phenol reagent. *J. Biol. Chem.* **193**, 265-275.
- MARTELL, A. E. & CALVIN, M. (1952). *Chemistry of the Metal Chelate Compounds*, pp. 122-125. New York: Prentice-Hall.
- MARTELL, A. E. & SMITH, R. M. (1977). *Critical Stability Constants*, vol. III, pp. 161-162. New York and London: Plenum Press.
- NAITOH, Y. (1968). Ionic control of the reversal response of cilia in *Paramecium caudatum*: A calcium hypothesis. *J. gen. Physiol.* **51**, 85-103.
- NAITOH, Y. & ECKERT, R. (1968a). Electrical properties of *Paramecium caudatum*: Modification by bound and free cations. *Z. vergl. Physiol.* **61**, 427-452.
- NAITOH, Y. & ECKERT, R. (1968b). Electrical properties of *Paramecium caudatum*: All-or-none electrogenesis. *Z. vergl. Physiol.* **61**, 453-472.
- NAITOH, Y. & ECKERT, R. (1974). The control of ciliary activity in Protozoa. In *Cilia and Flagella* (ed. M. A. Sleight), pp. 305-352. London and New York: Academic Press.
- NAITOH, Y., ECKERT, R. & FRIEDMAN, K. (1972). A regenerative calcium response in *Paramecium*. *J. exp. biol.* **56**, 667-681.
- NAITOH, Y. & KANEKO, H. (1972). ATP-Mg-reactivated triton-extracted models of *Paramecium* modification of ciliary movement by calcium ions. *Science, N.Y.* **176**, 523-524.
- NAITOH, Y. & YASUMASU, I. (1967). Binding of Ca ions by *Paramecium caudatum*. *J. gen. Physiol.* **50**, 1303-1310.
- OGURA, A. & TAKAHASHI, K. (1976). Artificial deciliation causes loss of calcium-dependent responses in *Paramecium*. *Nature, Lond.* **264**, 170-172.
- OERTEL, D., SCHEIN, S. J. & KUNG, C. (1977). Separation of membrane currents using a *Paramecium* mutant. *Nature, Lond.* **268**, 120-124.
- SATOW, Y. (1978). Internal calcium concentration and potassium permeability in *Paramecium*. *J. Neurobiol.* **9**, 81-91.
- SATOW, Y., CHANG, S. Y. & KUNG, C. (1974). Membrane excitability: Made temperature-dependent by mutations. *Proc. natn. Acad. Sci., Wash.* **71**, 2703-2706.
- SATOW, Y., HANSMA, H. & KUNG, C. (1976). The effect of sodium on 'Paranoiac' - a membrane mutant of *Paramecium*. *Comp. Biochem. Physiol.* **54A**, 323-329.
- SATOW, Y. & KUNG, C. (1974). Genetic dissection of the active electrogenesis in *Paramecium aurelia*. *Nature, Lond.* **247**, 69-71.
- SATOW, Y. & KUNG, C. (1976). Mutants with reduced Ca activation in *Paramecium aurelia*. *J. Membrane Biol.* **28**, 277-294.
- SCHEIN, S. J., BENNETT, M. V. L. & KATZ, G. J. (1976). Altered calcium conductance in pawns, behavioral mutants of *Paramecium aurelia*. *J. exp. Biol.* **65**, 699-724.
- SONNEBORN, T. M. (1970). Methods in *Paramecium* research. In *Methods in Cell Physiology*, vol. 4 (ed. D. Prescott), pp. 241-339. New York: Academic Press.
- SONNEBORN, T. M. (1975). The *Paramecium aurelia* complex of the sibling species. *Trans. Amer. Microsc. Soc.* **94**, 155-178.
